# Supplementary material
Source: publisher site journal article supplement (https://www.dovepress.com/article/482882)
Supplement: Supplementary file 1 [file get_supplementary_file.php]

**Supplementary Table 1.** *Summary Table*

| **- Reference**  **- Year**  **- Country** | **- Study Design**  **- Sample Size**  **- Focus Population**  **- Age (Mean ± SD)** | **Objective** | **- Educational intervention included in the study**  **- Professions Involved** | **Main results describing the impact of educational intervention in individuals with type 2 diabetes with insulin-treated** | **The impact of educational intervention in individuals with type 2 diabetes with insulin-treated (Theme)** | **Suggestions for future research** |
| --- | --- | --- | --- | --- | --- | --- |
| No.1  (Bala et al., 2019)  2019  Romania | - A prospective, multicenter, randomized, parallel-group study. - Romanian, 711 individuals with T2DM initiated on insulin therapy, Structured education group; 353   patients) vs standard education (control group; 358 patients).   - Individuals with T2DM for which there was an intention to initiate insulin therapy with basal insulin analogs (Glargine or Levemir). - Mean aged intervention group 59.2±9.0, control group 59.6±8.1. | - To assess the impact of structured education on glycemic control evaluated with HbA1c and on the achievement of individualized targets of HbA1c when provided to individuals with T2DM at the initiation of basal insulin therapy. | - The 2 sessions, 6-month structured education - Structured education consisted of a predefined, standardized education program with two face-to-face individual sessions of 1-hour duration each. - **Profession:** Performed by trained study nurses at Baseline and Visit 2. | The median HbA1c levels at 6 months after the start of basal insulin were  significantly lower in the structured education group than in the control group HbA1C 7.2% vs.  7.4%, p <0.001,  49.4% of subjects in the intervention group achieved HbA1c  targets vs. 34.4% in the control group, p <0.001. | **Improving HbA1C**   - The median HbA1c levels at 6 months after the start of basal insulin were significantly lower in the structured education group than in the control group (7.2% vs. 7.4%, p < 0.001). - In the structured education group, 49.4% of subjects achieved HbA1c - targets vs. 34.4% in the control group, p < 0.001.   **Reducing hypoglycemic event**   - The number of documented symptomatic hypoglycemic episodes (all and nocturnal) was lower in the intervention group (139 vs. 217 for all episodes and 13 vs. 26 for nocturnal hypoglycemia) | - A structured diabetes education program delivered to individuals with T2DM at the initiation of a basal insulin analog significantly improved glucose control and reduced the number of documented symptomatic hypoglycemic episodes at 6 months compared to a less intense education strategy. - Completion of episodes of hypoglycemia should be set as mandatory in a study procedure. |
| No.2  (Bellido et al., 2019)  2019  Spain | - An observational prospective study to assess the effect of a telephone support platform for T2DM, the eStar program, on insulin glargine treatment. - 215 individuals with T2DM (142 in the intervention group, 73 in the control group). - Individuals with T2DM who were initiating insulin glargine or requiring the titration of an existing insulin glargine dose. - Mean age is 62.8 ± 13 years old. | - To evaluate whether the eStar program was effective in helping individuals with T2DM reach their optimal insulin glargine dose within 6 months. | - The eStar program consisted of weekly telephone sessions until the individuals with T2DM reached the glycemic target. After that, calls were scheduled monthly for six months. - The sessions had neither face-to-face contact with individuals with T2DM nor access to their medical records. - The nurses had access to the web-based platform where physicians registered glycemic targets and current insulin doses. - During each session, individuals with T2DM received tailored education and expert advice on titration of their insulin glargine dose. - Furthermore, individuals with T2DM had a free 24-hour telephone service to solve their doubts. - **Profession:** The diabetes nurse educators had neither face-to-face contact with individuals with T2DM nor access to their medical records. | - Data was collected at initiation of the eStar program (baseline) and after 6 months. - The primary outcome was whether individuals with T2DM reached their optimal insulin glargine dose within 6 months. - The secondary outcomes were changes in HbA1C, FPG, insulin dose, and body mass index (BMI) at 6 months. - A significantly greater percentage of individuals with T2DM in the intervention group reached their optimal glargine dose than in the control group (83.8%vs.31.5%; p < 0.001). - After 6 months, significant reductions in mean HbA1C levels were observed in both groups: 1.49% (p < 0.001) for the intervention group and 1.08% (p<0.001) for the control group. - Furthermore, a mean reduction in FPG between groups was achieved (34.96 mg/dL; p < 0.001). | **Optimal dose of insulin**   - A significantly greater percentage of individuals with T2DM in the intervention group reached their optimal glargine dose than in the control group (83.8% vs. 31.5%; p < 0.001).   **Improving HbA1C**   - After 6 months, significant reductions in mean HbA1C levels were observed in both groups: 1.49% (p < 0.001) for the intervention group and 1.08% (p < 0.001) for the control group.   **Decreasing fasting plasma glucose (FPG)**   - A mean reduction in FPG between groups was achieved (34.96 mg/dL; p < 0.001). | - Telemedicine strategies can be effective in reducing HbA1c in individuals with T2DM compared to usual care. - A longer period of observation would probably have better consolidated the data but would have required a longer period and greater resources. - Hypoglycemic events should be assessed and reported. |
| No.3  (Boels et al., 2018)  2019  The Netherlands | - Open two-arm multicenter parallel randomized controlled superiority trial. - 230 individuals with T2DM (115 in the intervention group and 115 in the control group). - Individuals with T2DM on insulin therapy. - Mean age was 58.6±8.2 years in the intervention group versus 59.7±6.8 in the control group. | To investigate the effect of diabetes self-management education and support via a smartphone app in individuals with T2DM on insulin therapy. | - The intervention group received theory—and evidence-based self-management education and support via a smartphone app (optionally two or six times per week, once daily at different times). The control group received care as usual. - **Profession:** Endocrinologist. | - Primary outcome: HbA1c at 6 months. Other outcomes included HbA1c ≤ 53 mmol/ mol (≤7%) without any hypoglycemic event, body mass index, glycemic variability, dietary habits, and quality of life. - At 6 months, the HbA1c was 63.8 mmol/ mol (8.0%) in the intervention vs 66.2 mmol/mol (8.2%) in the control group; adjusted difference −0.93 mmol/mol (−0.08%), 95% CI −4.02 to 2.17 mmol/mol (−0.37% to 0.20%), p=0.557. - At follow-up, there were no statistically significant differences between the intervention and control group in any of the secondary outcomes | **Improving HbA1C**   - At 6 months, the HbA1c was 63.8 mmol/mol (8.0%) in the intervention vs 66.2 mmol/mol (8.2%) in the control group; adjusted difference −0.93 mmol/mol (−0.08%), 95% CI −4.02 to 2.17mmol/mol (−0.37% to 0.20%), p=0.557. - The odds for achieving an HbA1c level ≤ 7% without any hypoglycemic event was lower in the intervention group: OR 0.87, 95%CI 0.33 to 2.35. | To be effective, apps should optimally incorporate the needs of end users. While in our trial, participants could choose the frequency and topics of the intervention, future interventions should target specific populations, taking into account their needs and expectations. |
| No.4  (Font et al., 2021)  2021  Spain | - A prospective, longitudinal, pre/post-intervention, uncontrolled study with a duration of 18 months. - 184 individuals with T2DM being treated with ≥ 2 doses of insulin. - Individuals with T2DM being   treated with ≥ 2 doses of insulin with suboptimal metabolic  control requiring a referral to an ENS.   - Mean aged 68.4 ± 10.6 years old. | To evaluate the effectiveness of a  structured program intended for individuals with T2DM being treated with ≥2 doses of insulin with poor metabolic control. | - The program has a   duration of six months and is structured in individual visits  with the endocrinology and nutrition specialists (ENS) and the RAE diabetes APN (RAEDAPN), telephone visits and group education.   - The program consists of three phases - Phase 1, personalized education (face-to-face and telephone calls) - Phase 2, standardized group education - Phase 3, follow-up (face-to-face and telephone call) - **Profession:** Diabetes specialist nurse (DSN). | - A statistically significant reduction in HbA1c was seen in the   overall group at six months (9.0% ± 1.3% versus 7.8% ± 1.3%; p = 0.000) from the start of the program, associated with  a reduction in the number of episodes of mild hypoglycemia per patient per week (0.62 ± 1.20 versus 0.26 ± 0.65; p = 0.001).   - There were no significant differences in weight, body mass index or waist circumference compared to baseline. - Learning skills,   lifestyle, adherence to care, and the perception of quality of life had significantly improved at 6 months (p < 0.05). | **Improving HbA1C**   - In the first group, the mean reduction in HbA1c was −1.34% ± 1.45% without any increase in hypoglycemia episodes.   **Reducing hypoglycemic event**   - In the second group, a significant reduction in hypoglycemia episodes/week was observed (2.52 ± 1.66 vs. 0.53 ± 1.06; p < 0.05) without any increase in HbA1c.   **Engaging in self-management**   - Learning skills, lifestyle, and adherence to care had significantly improved at 6 months (p < 0.05).   **Improving quality of life**   - The perception of quality of life had significantly improved at 6 months (p < 0.05). | The main limitation of our study lies in its design.  A study of these characteristics without a control group does not  allow the results obtained to be reliably attributed to the  intervention made. Similarly, we cannot be sure of the duration of the results beyond the six months of the intervention, nor can we be certain that its results can be extrapolated to other health areas. |
| No.5  (Chai et al., 2022)  2022  China | - Not specify - A total of 209 individuals with T2DM. - Individuals with T2DM   taking one or two oral hypoglycemic agents  and basal insulin with fasting plasma glucose (FPG) values  > 7 mmol/l or hemoglobin A1c (HbA1c) > than 7%.   - Mean age 59.0 ± 10.6 | To evaluate the effect of education and mobile health management on the improvement of blood glucose levels in individuals with T2DM. | - Patients had to attend an hour-long education session on the first day at the hospital, and diabetes educator nurses explained how to use the panel computers. - The patients were followed up at weeks 1, 2, 4, 8, 12, and 16. - During follow-up, patients attended a video conference on diabetes education. They uploaded their insulin dosages three or more times for the FPG and postprandial plasma glucose (PPG) levels on the panel computer. - The education content included information on healthy diet, exercise, self-monitoring of blood glucose (SMBG), complication prevention, and the risk factors of diabetes. - **Profession:** Nurse and Medical staff. | - Compared with baseline, fasting plasma glucose (FPG) (9.7 mmol/l vs. 6.8 mmol/l, P < 0.001) and postprandial plasma glucose (PPG) (10.4 mmol/l vs. 9.5 mmol/l, P < 0.001) levels had decreased significantly at week 16. - The number of individuals with T2DM with HbA1c < 7% increased significantly from 33 at baseline to 115 at week 16 (P < 0.001). | **Decreasing fasting plasma glucose (FPG)**   - Fasting plasma glucose (FPG) (9.7 mmol/l vs. 6.8 mmol/l, P < 0.001)   **Decreasing postprandial plasma glucose (PPG)**   - Postprandial plasma glucose (PPG) (10.4 mmol/l vs. 9.5 mmol/l, P < 0.001) levels had decreased significantly at week 16.   **Improving HbA1C**   - The number of individuals with T2DM with HbA1c < 7% increased significantly from 33 at baseline to 115 at week 16 (P < 0.001). | - First, the mobile health management model could save manpower resources. - Second, individuals with T2DM can be managed efficiently with a mobile health management model. - Third, mobile health management could encourage individuals with T2DM to visit the hospital more regularly. |
| No.6  (Chu et al., 2021)  2021  Vietnam | - A pretest–posttest one-group quasi-experimental study. - 80 individuals with T2DM. - Outpatients with T2DM aged 18 or more who have been using insulin pens for at least one month. - Mean age was 59.6 (SD 8.1, range 35-75) years. | To evaluate the effectiveness of health education on knowledge about hypoglycemia and insulin pen use among outpatients individuals with T2DM at a primary care hospital in Vietnam. | - Participants were interviewed using a   predefined structural questionnaire to measure their knowledge about hypoglycemia and insulin pen.   - Participants were asked to demonstrate their use of an insulin pen on a model, and their level of practice was observed and recorded. - After that, individuals with T2DM underwent an individual health education session about hypoglycemia and insulin pen use. The researcher first presented these two topics using Microsoft PowerPoint and hard-copy flashcards. - Individuals with T2DM also watched a   manual video from the manufacturer on using insulin pens based on the pen they used.   - Individuals with T2DM with HbA1c were offered 15 minutes to practice using an insulin pen. - A take-home booklet with information about these two topics was also provided to   the patients.   - **Profession:** Not Specify. | - Knowledge about hypoglycemia was a significant improvement   The levels of knowledge about insulin pens were a significant improvement   - Participants had good practice using the insulin pen. The ceiling effect was observed in almost half of the practices evaluated, where patients had good practice before   the intervention.   - In overall, significantly higher improvements in knowledge and practice were found among young patients with high monthly income and those who had received counseling about insulin pens since their diagnosis. The   high education level was associated with high improvement in knowledge, but not in practice.   - There was a significant improvement in knowledge and practice after the intervention (p < 0.001). - Except for unused insulin storage, Changing injection site, and Injection site selection. - The improvement   remained high one month and two months after the intervention. | **Improving Knowledge**   - Knowledge of the definition, testing, treatment, and prevention of hypoglycemia was significantly improved right after the intervention. Although the prevalence of good knowledge decreased slightly one month after the intervention, the figures remained high after two months. - There was a significantly increased trend in the knowledge about hypoglycemia prevention. - The levels of knowledge about insulin pens were a significant improvement after the intervention. Such improvement remained high one month and two months after the intervention.   **Improving skill in using an insulin pen**   - Participants had good practice using insulin pens. The ceiling effect was observed in almost half of the practices evaluated, where patients had good practice before the intervention, and thus, there was no more room for improvement. - However, patients had improper practice toward priming the insulin pen, with low percentages of good practice before the intervention, ranging from 7.5% to 13.8%. These figures increased significantly after the intervention and during the one-month and two-month follow-ups. | There is a pressing need for such intervention at  primary care hospitals to optimize treatment for individuals with T2DM, possibly focusing on those who had characteristics that have the best effectiveness found in this study. |
| No.7  (Gentile et al., 2018)  2018  Italy | - A randomized, open-label, comparative, crossover trial (non-RCT) - 126 - Individuals with T2DM (They were also assessed for limited joint mobility syndrome, LJMS) - 65.5 ± 6.0 years | To compare glycemic control associated with a concentrated insulin analog preparation (U-200 lispro) in individuals with T2DM to that observed with standard U-100 lispro. | - A 4-week structured insulin injection education (did not specify the detail of education) - **Profession:** Not specified. | - U-200 lispro treatment was associated with a significant improvement in fasting plasma glucose (FPG), HbA1c, severe or mild hypoglycemic rate, and daily fast-acting insulin analog dose with around a 20% decrease in insulin requirement. - Patients’ answers to the questionnaire pointed out a higher preference for U-200 lispro for continuing treatment due to fewer difficulties completing injections. | **Decreasing fasting plasma glucose (FPG)**   - Significant improvement in the U-200 treatment   **Improving HbA1c**   - Significant improvement in the U-200 treatment   **Reducing hypoglycemic event**   - Significant improvement in the U-200 treatment   **Optimal daily fast-acting insulin analog dose**   - Significant improvement in the U-200 treatment | Extend the study to assess the enduring effectiveness of U-200 lispro compared to other insulin analogs, focusing on sustained glycemic control, patient preferences, and cost-effectiveness over an extended period. Investigate the impact of tailored education strategies, considering diverse patient populations, and explore the specific benefits of U-200 lispro for individuals with LJMS. |
| No.8  (Gentile et al., 2021)  2021  Italy | - A Randomized Control Trial (RCT) - 158 (Intervention Group = 79, Control Group = 79) - Individuals with T2DM - 64 ± 11 year (Control Group), 62 ± 13 (Intervention Group) | To compare the injection habits, daily insulin dose requirement, number  of severe or symptomatic hypoglycemic events, and glycated hemoglobin (HbA1c) levels between the intervention group (structured, education-based rehabilitation) versus a control group. | - 6-month structured education-based rehabilitation protocol on best insulin injection practice with a monthly phone reminder - (Each session involved ten people at most and lasted approximately 60 min. Each session made use of the BD Educational Starter Kit (Becton Dickinson, Inc., Franklin Lakes, NJ, USA), including site rotation grids, educational injection technique leaflets, and a blood glucose logbook. The LH ‘‘look and feel’’ teaching method used a BD Lipobox to provide visual and tactile clues for typical LH lesion identification) - **Profession:** Multidisciplinary, including 10 people (not specify profession of intervention provider). | - The intervention group exhibited a notable reduction in both the rate of injection technique errors (p < 0.001) and the size of lipohypertrophic lesions at injection sites (p < 0.02). - Conversely, the control group showed a progressive departure from best practices, with significantly higher HbA1c levels and daily insulin dose requirements at the end of the follow-up compared to baseline (p < 0.05), except for the continued use of ice-cold insulin. - The intervention group experienced a decrease in the rate of hypoglycemic episodes (p < 0.05), leading to a significant intergroup difference after 6 months (p < 0.02). | **Improving insulin injection technique**   - The intervention group exhibited a notable reduction in both the rate of injection technique errors (p < 0.001)   **Reducing the size of lipohypertrophy**   - The intervention group exhibited a reduction in the size of lipohypertrophic lesions at injection sites (p < 0.02).   **Reducing hypoglycemic event**   - The intervention group experienced a decrease in the rate of hypoglycemic episodes (p < 0.05), leading to a significant intergroup difference after 6 months (p < 0.02). | Explore optimal strategies for maintaining positive behavioral changes in insulin injection practices for individuals with T2DM. Consider the frequency of refresher courses, personalized approaches, and the impact of technology, aiming for sustained improvements in glycemic control and long-term health outcomes. |
| No.9  (Huang et al., 2022)  2022  China | - A quasi-experimental, nonequivalent, two-group, comparison   group design   - 339 - Individuals with T2DM - 54 (no SD reported) | To evaluate the effectiveness of a nurse-led online educational  program based on individuals with T2DM treated with initial basal insulin therapy. | - A nurse-led online educational program (Interview, personalized education, patient consultation, patient online evaluation) - **Profession:** Nurse. | - 3 months after the intervention, the compliance rate of fasting plasma glucose (FPG) (rate difference: 0.078, 95% CI: 0.006–1.150, p < .05) and HbA1c (%) (rate difference: 0.070, 95% CI: 0.001–0.137, p < .05) between the intervention and control groups were statistically significant, which intervention group shows the higher compliance rate. - 6 months after the intervention, the compliance rate of FPG (rate difference: 0.077, 95% CI: 0.007–0.14, p < .05) and HbA1c (%) (rate difference: 0.106, 95% CI: 0.324–0.180, p < .01) between the intervention and the control groups were statistically significant, which intervention group shows the higher compliance rate. | **Decreasing fasting plasma glucose (FPG)**   - 3 months after the intervention, the compliance rate of fasting plasma glucose (FPG) was increased (rate difference: 0.078, 95% CI: 0.006–1.150, p < .05) - 6 months after the intervention, the compliance rate of FPG was increased (rate difference: 0.077, 95% CI: 0.007–0.14, p < .05)   **Improving HbA1C**   - 3 months after the intervention, the compliance rate of HbA1c (%) (rate difference: 0.070, 95% CI: 0.001–0.137, p < .05) was increased - 6 months after the intervention, the compliance rate of HbA1c (%) was increased (rate difference: 0.106, 95% CI: 0.324–0.180, p < .01) | Future research should focus on the long-term effectiveness, demographic influences, scalability, and economic implications of nurse-led online education for diabetes management. Exploring patient engagement, integrating emerging technologies, and assessing transferability to other chronic conditions are also key areas for investigation. Comparative studies on various online education delivery methods will help optimize approaches for better patient outcomes. |
| No.10  (Miranda et al., 2022)  2022  Brazil | - A Randomized Control Trial - 41 (Intervention Group = 20, Control Group = 21) - Individuals with T2DM - 55.9 (SD = 5.49) | To investigate the effects of problematizing intervention in the treatment of individuals with T2DM. | - An educational intervention   - Demand analysis (survey of prior knowledge on the subject) - Pre-analysis of the context, and group issues (planning) - Survey of generating themes and definition of focus (execution) - Evaluation, through the verbalization of solutions applicable to the participants’ reality - **Profession:** Not specified. | - The intervention group showed an increase in knowledge about the disease, as well as improvements in total cholesterol and uric acid levels. - No statistically significant difference in glycemic control and anthropometric parameters was observed between participants in either study group. | **Improving Knowledge**   - Improving knowledge about the disease | Future research could focus on the sustained effects of problematizing interventions over extended periods, tailoring interventions to individual patient needs, conducting comparative studies with other educational approaches, validating findings through multi-center trials, examining the impact on behavioral and psychosocial factors, evaluating economic implications, exploring technology integration, assessing patient-centered outcomes, investigating interventions' potential to mitigate health disparities, and conducting mechanistic studies to understand underlying intervention effects. |
| No.11  (Ratri et al., 2020)  2020  Indonesia | - Quasi-experimental study (one-group pretest and posttest) - 100 - Individuals with T2DM - 18-44 years (15 %), 45-64 years (66 %), > 65 years (19 %) (no mean age reported) | To determine the effectiveness of video as an educational media for insulin therapy on knowledge and attitude in individuals with T2DM. | The six minutes educational video   - Part 1: An explanation of its signs and symptoms, including non-pharmacological and pharmacological therapy for individuals with T2DM. - Part 2: More specific information about insulin, including the types, forms, methods of usage, rules for insulin storage, its side effects, and how to handle it. - **Profession:** Not specific. | - The patient’s knowledge significantly increases after intervention (Z=-8.212, P < 0.05). - The patient’s attitude is significantly increased after intervention (Z = -8.234 and P < 0.05). | **Improving Knowledge**   - The patient’s knowledge significantly increases after intervention (Z=-8.212, P < 0.05).   **Improving the patient’s attitude**   - The patient’s attitude is significantly increased after intervention (Z = -8.234 and P < 0.05). | - Future research could delve into the long-term effects of video-based insulin therapy education on knowledge retention and attitude improvement. - Additionally, it is important to explore the effectiveness across diverse patient populations and healthcare settings, compare it with other interventions, understand healthcare provider involvement, assess cost-effectiveness and investigate patient satisfaction. - Qualitative research can provide valuable insights into patient experiences with video-based education. |

**References**

Bala, C., Rusu, A., Moise, M., & Roman, G. (2019). The impact of structured diabetes education on glycemic control in patients with type 2 diabetes at initiation of basal insulin-the basal-EDUC-RO study: a randomized prospective study. *Romanian Journal of Diabetes Nutrition and Metabolic Diseases*, *26*(2), 185-198.

Bellido, V., Bellido, D., Tejera, C., Carral, F., Goicolea, I., Soto, A., . . . López de la Torre, M. (2019). Effect of Telephone-Delivered Interventions on Glycemic Control in Type 2 Diabetes Treated with Glargine Insulin. *Telemed J E Health*, *25*(6), 471-476. <https://doi.org/10.1089/tmj.2018.0014>

Boels, A. M., Rutten, G., Zuithoff, N., De Wit, A., & Vos, R. (2018). Effectiveness of diabetes self-management education via a smartphone application in insulin treated type 2 diabetes patients–design of a randomised controlled trial (‘TRIGGER study’). *BMC Endocr Disord*, *18*(1), 1-10.

Chai, S., Wang, D., Yao, B., Xu, L., Ji, L., & Zhang, X. (2022). The effect of education and mobile health management on improvement of blood glucose with type 2 diabetes mellitus. *Journal of Public Health*, 1-5.

Chu, L. T., Nguyen, T. Q., Pham, P. T. T., & Thai, T. T. (2021). The Effectiveness of Health Education in Improving Knowledge about Hypoglycemia and Insulin Pen Use among Outpatients with Type 2 Diabetes Mellitus at a Primary Care Hospital in Vietnam. *J Diabetes Res*, *2021*.

Font, C. C., Francia, C. C., Torres, I. V., i Morató, M. J., & Donlo, I. C. (2021). A therapeutic education program with a diabetes specialist nurse for type 2 diabetes patients using insulin in a primary care setting. A diabetes education program with a diabetes specialist nurse in a primary care setting. *Endocrinología, Diabetes y Nutrición (English ed.)*, *68*(9), 628-635.

Gentile, S., Fusco, A., Colarusso, S., Piscopo, M., Improta, M. R., Corigliano, M., . . . Simonetti, R. (2018). A randomized, open-label, comparative, crossover trial on preference, efficacy, and safety profiles of lispro insulin u-100 versus concentrated lispro insulin u-200 in patients with type 2 diabetes mellitus: a possible contribution to greater treatment adherence. *Expert Opinion on Drug Safety*, *17*(5), 445-450.

Gentile, S., Guarino, G., Della Corte, T., Marino, G., Satta, E., Pasquarella, M., . . . Loiacono, F. (2021). The durability of an intensive, structured Education-Based rehabilitation protocol for best insulin injection practice: the ISTERP-2 study. *Diabetes Therapy*, *12*(9), 2557-2569.

Huang, W., Wei, W., Wang, J., Lyu, Y., & Li, L. (2022). Effectiveness of a nurse‐led online educational programme based on basic insulin therapy in patients with diabetes mellitus: A quasi‐experimental trial. *J Clin Nurs*, *31*(15-16), 2227-2239.

Miranda, L. d. S. P., Ezequiel, D. G. A., Vanelli, C. P., Colugnati, F. A. B., Ferreira, M., Moreira, R. O., . . . do Amaral Corrêa, J. O. (2022). Impact of an educational intervention in the management of individuals with uncontrolled type 2 diabetes mellitus using insulin therapy. *Prim Care Diabetes*, *16*(4), 496-501.

Ratri, D. M., Hamidah, K. F., Puspitasari, A. D., & Farid, M. (2020). Video-based health education to support insulin therapy in diabetes mellitus patients. *J Public Health Res*, *9*(2), jphr. 2020.1849.
